# Supplementary material
Source: publisher site journal article supplement (https://static.cambridge.org/content/id/urn:cambridge.org:id:article:S0032247419000019/resource/name/S0032247419000019supp001.docx)
Supplement: Supplementary file 1 [file S0032247419000019supp001.docx]

Table S1. Data for Fig. 2

| **Year** | **Net migration** | **Net Domestic** | **Net International** |
| --- | --- | --- | --- |
| **2008** | -6519 | -7370 | 851 |
| **2009** | -5019 | -5604 | 585 |
| **2010** | -7956 | -8202 | 246 |
| **2011** | -9347 | -10058 | 711 |
| **2012** | -10244 | -10617 | 373 |
| **2013** | -9848 | -10107 | 259 |
| **2014** | -7721 | -8469 | 748 |
| **2015** | -8018 | -9198 | 1180 |
| **2016** | -6586 | -7638 | 1052 |
| **2017** | -8046 | -8410 | 365 |

Table S2. Data for Fig. 3

| **Year** | **Net Migration** | **Net Domestic** | **Net International** |
| --- | --- | --- | --- |
| **2008** | -150 | -181 | 31 |
| **2009** | 70 | 24 | 46 |
| **2010** | -130 | -152 | 22 |
| **2011** | 135 | 46 | 89 |
| **2012** | 50 | -31 | 81 |
| **2013** | -12 | -104 | 92 |
| **2014** | 6 | -160 | 166 |
| **2015** | 101 | -114 | 215 |
| **2016** | -320 | -393 | 73 |
| **2017** | -231 | -279 | 48 |

Table S3. Data for Fig. 4

| **Year** | **Net Migration** | **Net Domestic** | **Net International** |
| --- | --- | --- | --- |
| **2008** | -7417 | -7956 | 539 |
| **2009** | -4804 | -6227 | 1423 |
| **2010** | -6713 | -8232 | 1519 |
| **2011** | -6072 | -8233 | 2161 |
| **2012** | -7925 | -9146 | 1221 |
| **2013** | -10017 | -11078 | 1061 |
| **2014** | -4998 | -6696 | 1698 |
| **2015** | -4384 | -6455 | 2071 |
| **2016** | -4343 | -5149 | 806 |
| **2017** | -3503 | -4383 | 880 |

Table S4. Data for Fig. 5

| **Year** | **Net migration** | **Net Domestic** | **Net International** |
| --- | --- | --- | --- |
| **2008** | -9119 | -9466 | 347 |
| **2009** | -7075 | -7430 | 355 |
| **2010** | -8630 | -8804 | 174 |
| **2011** | -10033 | -11347 | 1314 |
| **2012** | -10786 | -11487 | 701 |
| **2013** | -10534 | -11504 | 970 |
| **2014** | -9303 | -9623 | 320 |
| **2015** | -8738 | -9487 | 749 |
| **2016** | -6932 | -7618 | 686 |
| **2017** | -9470 | -8977 | -493 |

Table S5. Data for Fig. 6

| **Year** | **Net migration** | **Net Domestic** | **Net International** |
| --- | --- | --- | --- |
| **2007** | -606 | -2209 | 1603 |
| **2008** | -4014 | -5598 | 1584 |
| **2009** | -2417 | -3820 | 1403 |
| **2010** | -4953 | -6008 | 1055 |
| **2011** | 6249 | -2621 | 8870 |
| **2012** | -1127 | -4517 | 3390 |
| **2013** | -8124 | -10645 | 2521 |
| **2014** | -6068 | -9214 | 3146 |
| **2015** | -11972 | -8132 | -3840 |
| **2016** | -3491 | -4680 | 1189 |
| **2017** | -2418 | -4288 | 1870 |

Table S6. Data for Fig. 7

| **Year** | **Net migration** | **Net Domestic** | **Net International** |
| --- | --- | --- | --- |
| **2008** | 1542 | -4494 | 6036 |
| **2009** | 3626 | -3091 | 6717 |
| **2010** | 2226 | -3201 | 5427 |
| **2011** | 7967 | 1404 | 6563 |
| **2012** | 3793 | -1460 | 5253 |
| **2013** | 1391 | -4726 | 6117 |
| **2014** | 935 | -4268 | 5203 |
| **2015** | 2753 | -3866 | 6619 |
| **2016** | 4828 | -2806 | 7634 |
| **2017** | 929 | -4465 | 5394 |

Table S7. Data for Fig. 8

| **Year** | **Net migration** | **Net Domestic** | **Net International** |
| --- | --- | --- | --- |
| **2008** | -7467 | -8239 | 772 |
| **2009** | -7023 | -7605 | 582 |
| **2010** | -7126 | -7607 | 481 |
| **2011** | -9809 | -10493 | 684 |
| **2012** | -8359 | -9285 | 926 |
| **2013** | -9130 | -9619 | 489 |
| **2014** | -6708 | -6992 | 284 |
| **2015** | -5387 | -5802 | 415 |
| **2016** | -4153 | -4810 | 657 |
| **2017** | -4649 | -5171 | 482 |

Table S8. Data for Fig. 9

| **Year** | **Net migration** | **Net Domestic** | **Net International** |
| --- | --- | --- | --- |
| **2008** | -874 | -919 | 45 |
| **2009** | -984 | -1031 | 47 |
| **2010** | -853 | -897 | 44 |
| **2011** | 515 | 275 | 240 |
| **2012** | -336 | -350 | 14 |
| **2013** | -354 | -612 | 258 |
| **2014** | -154 | -414 | 260 |
| **2015** | -589 | -707 | 118 |
| **2016** | -516 | -594 | 78 |
| **2017** | -656 | -662 | 6 |
